# Supplementary material for: Giant enhancement of second-harmonic generation of indium selenide on planar Au
Source: Royal Society of Chemistry journal article supplement (doi:10.1039/d3nr00526g), 2023-01-01
Supplement: d3nr00526g1.pdf [file d3nr00526g1.pdf]

## Supporting information

### **Giant Enhancement of Second-Harmonic Generation in Indium Selenide on Planar Au**

Yuxuan Ke,<sup>†</sup> Chun Li,<sup>†</sup> Yin Liang,<sup>†</sup> Xi Zhang, Jiepeng Song,<sup>†</sup> Ruijie Li,<sup>†</sup> Lei Liu,<sup>†</sup>  
Junfeng Dai, Zhongming Wei,<sup>§</sup> Qing Zhang.<sup>†,\*</sup>

<sup>†</sup>School of Materials Science and Engineering, Peking University, Beijing 100871, China

<sup>‡</sup>Southern University of Science and Technology, Shenzhen, 518055, China

<sup>§</sup>State Key Laboratory of Superlattices and Microstructures, Institute of Semiconductors, Chinese Academy of Sciences, Beijing 100083, China

\*Corresponding: [Q\\_zhang@pku.edu.cn](mailto:Q_zhang@pku.edu.cn)

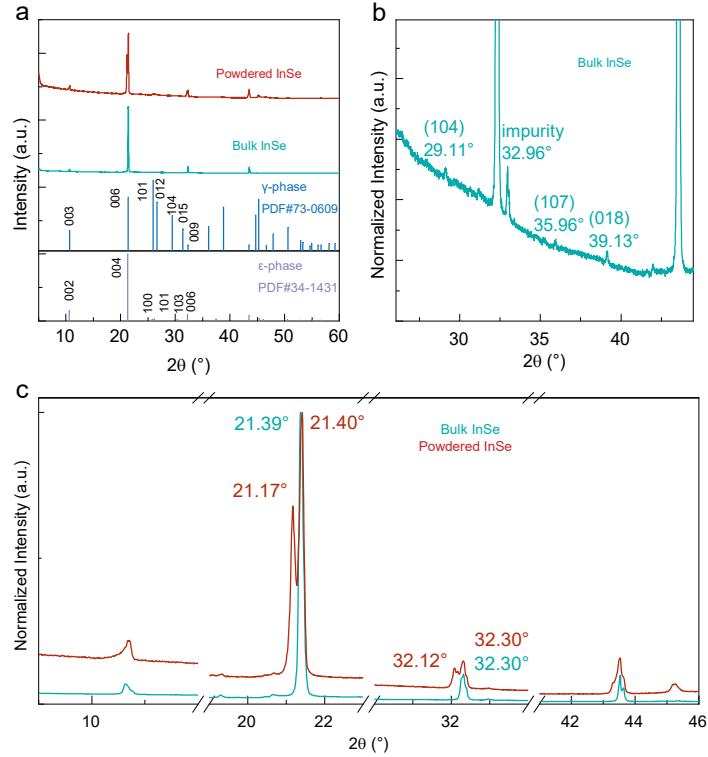

**Fig. S1** (a) XRD patterns of the bulk (cyan) and powdered (red) InSe. (b) The zoomed-in XRD pattern of the bulk InSe with the large angle range. (c) The zoomed-in XRD patterns of the bulk and powdered InSe at these peaks of  $21.39^\circ$  and  $32.3^\circ$ .

To confirm the phase of InSe in our work, the X-ray diffraction (XRD) patterns of the bulk and powdered InSe by grinding were performed in Fig. S1a. Fig. S1b shows that these peaks of  $29.11^\circ$ ,  $35.96^\circ$  and  $39.13^\circ$  match with the standard data file PDF 73-0609, corresponding to (104), (107) and (018) planes of  $\gamma$ -InSe. Meanwhile, in comparison of XRD patterns of bulk and powdered InSe (Fig. S1c), these two peaks ( $21.39^\circ$  and  $32.30^\circ$ ) of bulk InSe correspond to the (006) and (009) planes of  $\gamma$ -InSe. However, two splitting peaks ( $21.17^\circ$  and  $32.12^\circ$ ) of powdered InSe correspond to the (004) and (006) planes of  $\varepsilon$ -InSe. Layer gliding during the grinding process could result in the formation of  $\varepsilon$ -phase in  $\gamma$ -phase powdered InSe, and thus the peak splitting.<sup>1</sup> These indicate that the InSe in our work is  $\gamma$ -phase.

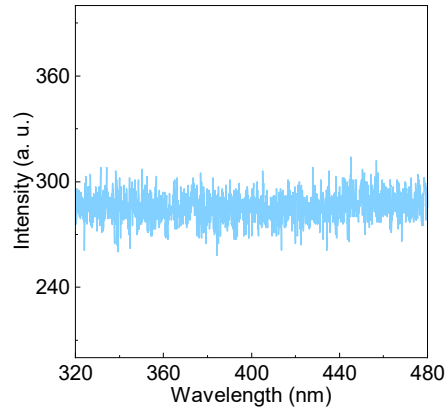

**Fig. S2** The SHG spectrum of Au film with no obvious signal. The excitation wavelength is 800 nm with the power is 1 mW, and the integration time is 1 s.

**Fig. S3** (a) As-fabricated InSe/h-BN/Au hybrid structure where InSe is 33 nm and h-BN is 7 nm. The scale bar is 50  $\mu\text{m}$ . (b) SHG spectrum of h-BN on Au. SHG intensities of InSe on Au and h-BN/Au substrates under wavelength excitation of 800 nm with moderate (c) and high (d) power densities of  $1.6 \times 10^8$  and  $8.1 \times 10^8$   $\text{mW}/\text{cm}^2$ , respectively. Ten groups of data are

measured on the same position. The lateral-view excitation electric field distributions of 33-nm-thick InSe on Au (e) and h-BN/Au (f), respectively, with excitation wavelength of 800 nm.

Fig. S3a shows an as-fabricated InSe/h-BN/Au hybrid structure where InSe is 33 nm and h-BN is 7 nm. The exfoliated h-BN was firstly transferred onto SiO<sub>2</sub> with Au film patterns, making one part of h-BN located on the top of Au film and another on the top of SiO<sub>2</sub> substrate. The exfoliated InSe was transferred on h-BN/Au, making the one part of InSe on the top of h-BN/Au and another on the top of Au. To research the effect of charge transfer on SHG of InSe on Au, the InSe/h-BN/Au hybrid structure can be designed as a control experiment and h-BN is as a block layer of charge transfer. Fig. S3c displays SHG intensity distributions of InSe on Au and h-BN/Au under excitation wavelength of 800 nm with moderate power density of  $1.6 \times 10^8$  mW/cm<sup>2</sup>. The average intensity of InSe on h-BN/Au is approximately 1.4-fold larger than that on Au. The contribution of h-BN SHG can be excluded as no obvious SHG signal can be observed in Fig. S3b due to even number of layers with inversion symmetry.<sup>2</sup> Figs. S3e and S3f show that according to calculated electric field distributions by finite-differences time-domain, the  $|E|^4$  of InSe on h-BN/Au is enhanced by approximately 2.0-fold compared to that on Au. This indicates that the SHG enhancement of InSe on h-BN/Au is attributed to the electric field enhancement, and charge transfer have little influence on the SHG intensity for the InSe/Au structure. For high power density of  $8.1 \times 10^8$  mW/cm<sup>2</sup>, however, the average intensity of InSe on h-BN/Au is approximately 1.1-fold larger than that on Au (Fig. S3d), indicating that the charge transfer generates the significant influence on the SHG for InSe/Au structure.

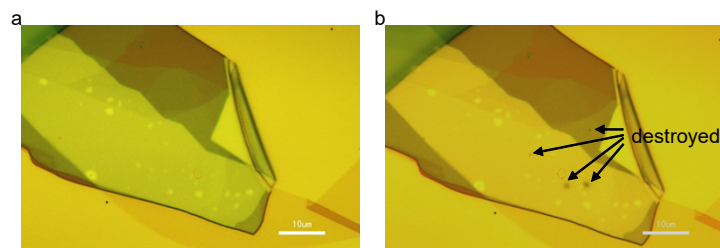

**Fig. S4** The optical images of InSe (32 nm) on Au substrate before (a) and after (b) measurement using the high excitation density of  $1.1 \times 10^9$  mW cm<sup>-2</sup>.

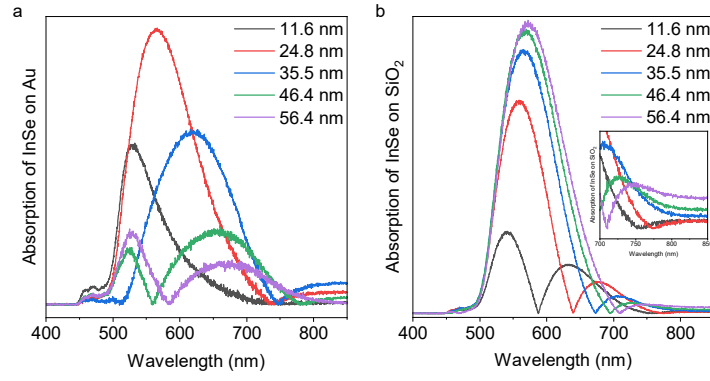

**Fig. S5** Absorptions of InSe with 11.6, 24.8, 35.5, 46.4 and 56.4 nm thickness for InSe-Au (a) and InSe-SiO<sub>2</sub> (b) structures; inset is the zoomed-in absorption spectrum of InSe on SiO<sub>2</sub> substrate (b) from 700 to 850 nm. The absorption is defined as  $A = \frac{R_{Substrate} - R_{InSe}}{R_{Substrate}}$ , where  $A$  is the absorption within InSe for InSe-Au and InSe-SiO<sub>2</sub> structures, and  $R_{Substrate}$  and  $R_{InSe}$  are reflection spectra of Au/SiO<sub>2</sub> and InSe on Au/SiO<sub>2</sub>, respectively.

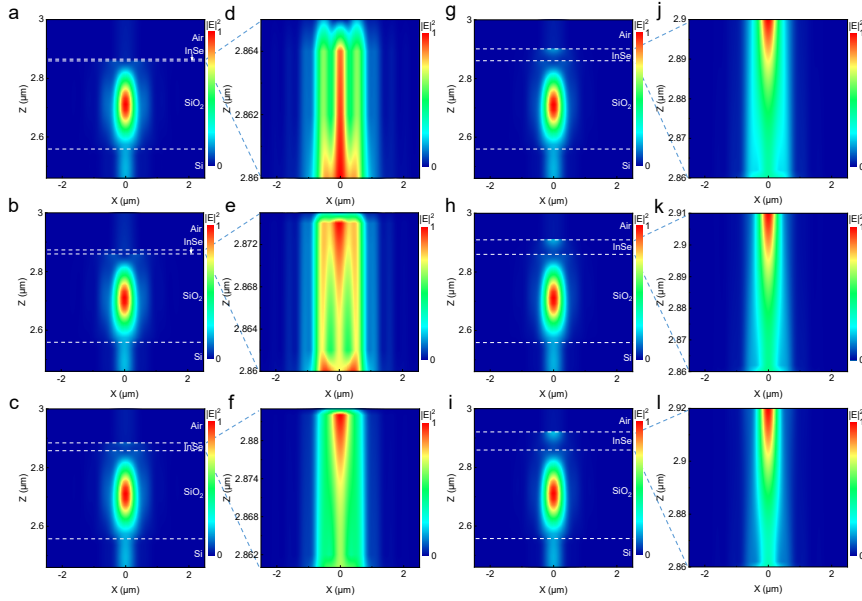

**Fig. S6** The lateral-view excitation electric field distributions of InSe on SiO<sub>2</sub> with different thickness. The lateral-view excitation electric field distribution of InSe on SiO<sub>2</sub> with 5 (a), 15 (b), 25 (c), 40 (g), 50 (h) and 60 nm (i), respectively. (d-f, j-l) corresponding zoomed-in electric field distributions of InSe. The excitation wavelength is 800 nm.

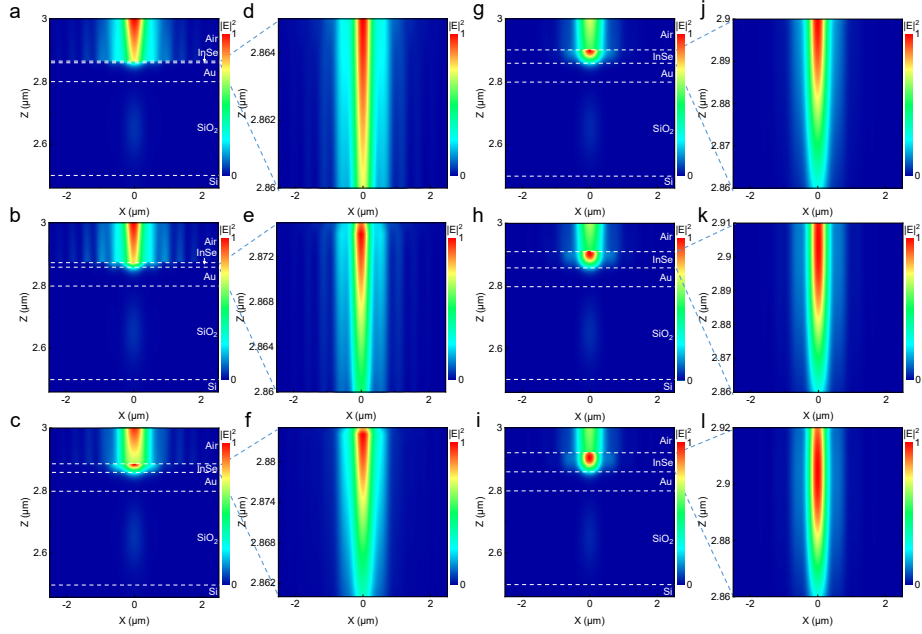

**Fig. S7** The lateral-view excitation electric field distributions of InSe on Au with different thickness. The lateral-view excitation electric field distribution of InSe on Au with 5 (a), 15 (b), 25 (c), 40 (g), 50 (h) and 60 nm (i), respectively. (d-f, j-l) corresponding zoomed-in electric field distributions of InSe. The excitation wavelength is 800 nm.

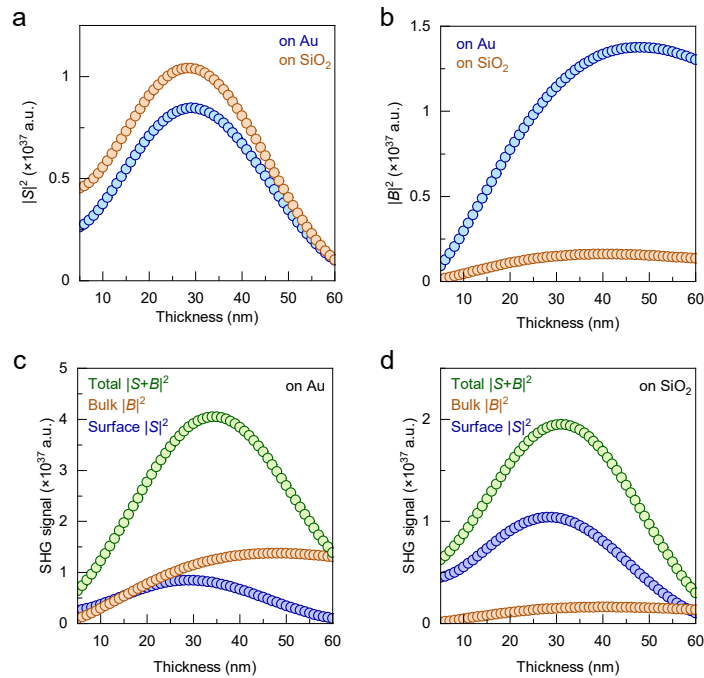

**Fig. S8** Reflection simulation of InSe on Au and SiO<sub>2</sub>, respectively, as a function of thickness. (a, b)  $|S|^2$  and  $|B|^2$  SHG contributions of InSe on Au (blue) and SiO<sub>2</sub> (orange), respectively, as

functions of  $H$ . (c-d)  $|S|^2$  (blue),  $|B|^2$  (orange), and  $|S+B|^2$  (green) SHG contributions of InSe on Au and  $\text{SiO}_2$ , respectively, as a function of  $H$ .

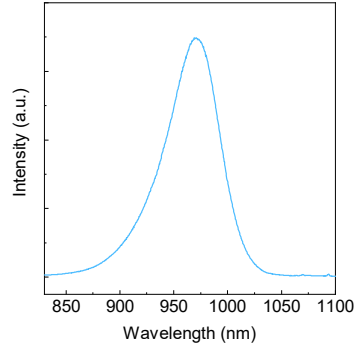

**Fig. S9** The PL spectrum of InSe with  $\approx 30$  nm thickness under 532 nm excitation with the power of 1.5 mW. The peak is 970 nm.

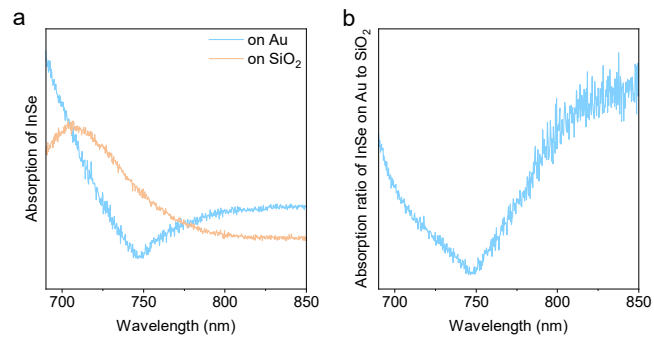

**Fig. S10** (a) Absorption spectra of 35.5 nm-InSe on Au and  $\text{SiO}_2$  substrates from 690 to 850 nm; (b) the absorption ratio of InSe on Au to  $\text{SiO}_2$ .

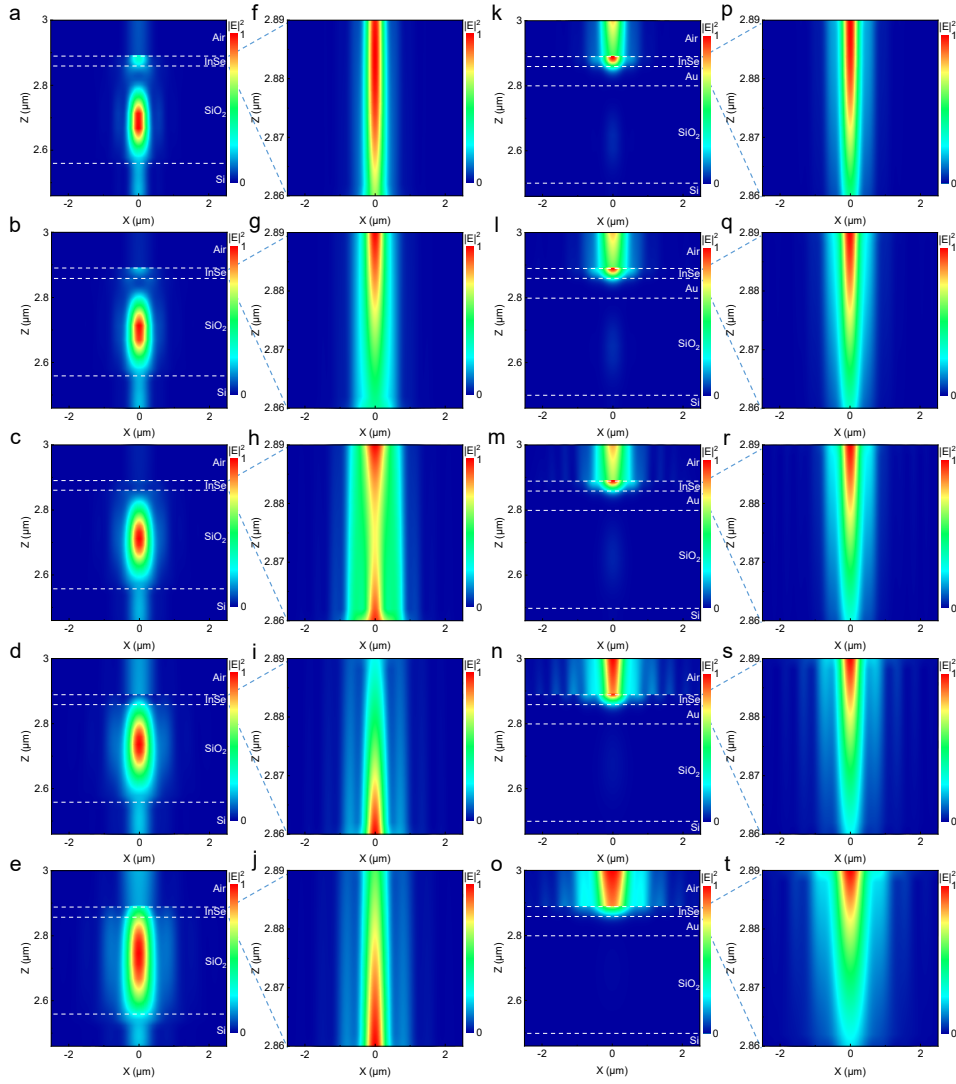

**Fig. S11** The lateral-view excitation electric field distributions of 30-nm-thick InSe on SiO<sub>2</sub> and Au, respectively, with different excitation wavelengths. The lateral-view excitation electric field distributions of 30-nm-thick InSe on SiO<sub>2</sub> (a-e) and Au (k-o), respectively, with 690, 750, 820, 940, and 1060 nm. (f-j, p-t) corresponding zoomed-in electric field distributions of InSe on SiO<sub>2</sub> and Au, respectively.



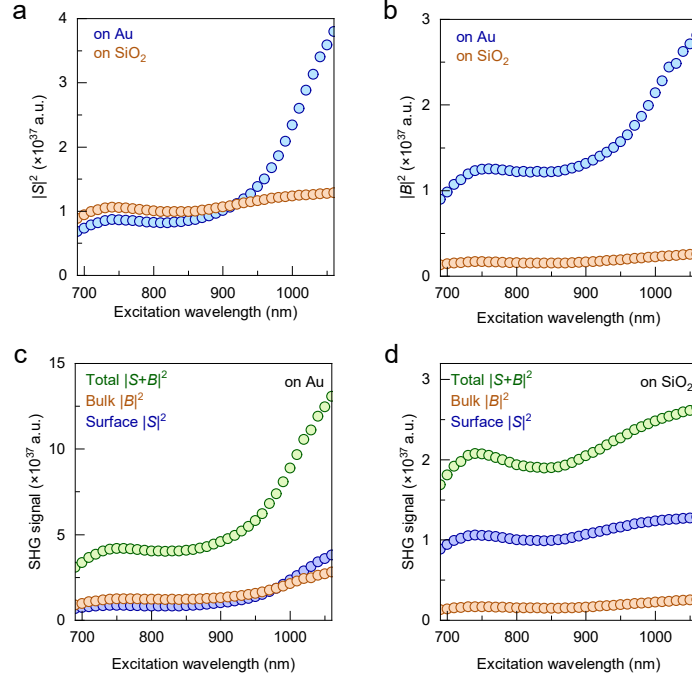

**Fig. 12** SHG Reflection simulation of InSe on Au and SiO<sub>2</sub>, respectively, as a function of excitation wavelength. (a-b)  $|S|^2$  and  $|B|^2$  SHG contributions of InSe on Au (blue) and SiO<sub>2</sub> (orange), respectively, as functions of excitation wavelength. (c-d)  $|S|^2$  (blue),  $|B|^2$  (orange), and  $|S+B|^2$  (green) SHG contributions of InSe on Au and SiO<sub>2</sub>, respectively, as a function of excitation wavelength.

### Note S1. Theory model

This model is used to explain the interference between surface and bulk SHG without considering phase mismatch from the bulk contribution of SHG. In this model, a geometry consisting of three layers is considered: air (layer 0), InSe (layer 1) and the SiO<sub>2</sub> (or Au) substrate (layer 2) where  $n_0$ ,  $N_1(\omega) = n_1(\omega) + ik_1(\omega)$  and  $N_2(\omega) = n_2(\omega) + ik_2(\omega)$ . For the index of air, the imaginary part is assumed as zero due to negligible weak light absorption. The total second harmonic intensity as a function of the InSe thickness can be written as:<sup>3,4</sup>

$$I_{SHG}(L) = \frac{32\pi^3\omega^2}{c^3 n_1(\omega) n_1(2\omega)} |S(L) + B(L)|^2 I_0^2$$

where  $L$  is the thickness of InSe,  $S$  is the contributions from the top and bottom surface SHG,  $B$  is the contribution from bulk SHG, and  $I_0$  is the intensity of excited light. For simplicity, two first SHG contributions of the multiple reflections are only considered in the calculations of  $S(L)$  and  $B(L)$ . Therefore,

$$S(L) = \chi_s^{(2)} \left( R_{01} + T_{01} T_{10} R_{12} e^{2iKL} + t_{10}^2 R_{12} T_{10} e^{2ikL} e^{iKL} \right)$$

and

$$B(L) = \chi_b^{(2)} L \left( T_{10} t_{10}^2 R_{12} e^{2iKL} + t_{10}^2 r_{12}^2 T_{10} e^{2ikL} e^{iKL} \right)$$

where  $r_{ij} = \frac{n_i - n_j}{n_i + n_j}$ ,  $t_{ij} = \frac{2n_i}{n_i + n_j}$  are the Fresnel coefficients at the excited wavelength  $\lambda$ ,

and  $R_{ij} = \frac{n_i - n_j}{n_i + n_j}$ ,  $T_{ij} = \frac{2n_i}{n_i + n_j}$  at the second harmonic wavelength  $\lambda_2$ .  $k = \frac{2\pi N_1(\omega)}{\lambda_\omega}$  and

$K = \frac{2\pi N_1(2\omega)}{\lambda_{2\omega}}$  are the wave vectors at the excited and second harmonic wavelengths,

respectively.  $\chi_s^{(2)}$  is the second-order sheet polarizability for InSe surfaces, and  $\chi_b^{(2)}$  is the second-order nonlinear susceptibility for the InSe bulk.

## References

- 1 T.-R. Wei, M. Jin, Y. Wang, H. Chen, Z. Gao, K. Zhao, *et al.*, Exceptional plasticity in the bulk single-crystalline van der Waals semiconductor InSe, *Science*, 2020, **369**(6503), 542-545.
- 2 Y. Li, Y. Rao, K. F. Mak, Y. You, S. Wang, C. R. Dean, *et al.*, Probing Symmetry Properties of Few-Layer MoS<sub>2</sub> and h-BN by Optical Second-Harmonic Generation, *Nano Lett.*, 2013, **13**(7), 3329-3333.
- 3 J. Shi, P. Yu, F. Liu, P. He, R. Wang, L. Qin, *et al.*, 3R MoS<sub>2</sub> with Broken Inversion Symmetry: A Promising Ultrathin Nonlinear Optical Device, *Adv. Mater.*, 2017, **29**(30), 1701486.

- 4 B. Koopmans, A. Anema, H. T. Jonkman, G. A. Sawatzky, F. van der Woude, Resonant-Optical-Second-Harmonic Generation from Thin C<sub>60</sub> Films, *Phys. Rev. B*, 1993, **48**(4), 2759-2764.
